# Supplementary material for: The Estimation of Genetic Parameters for Chronic Progressive Lymphedema and Body Traits in the Rhenish German Draught Horse
Source: MDPI journal article supplement (doi:10.3390/ani14081214), 2024-04-18
Supplement: s1 [file s1]

**Figure S1.** Photographs of Rhenisch German draught horses.

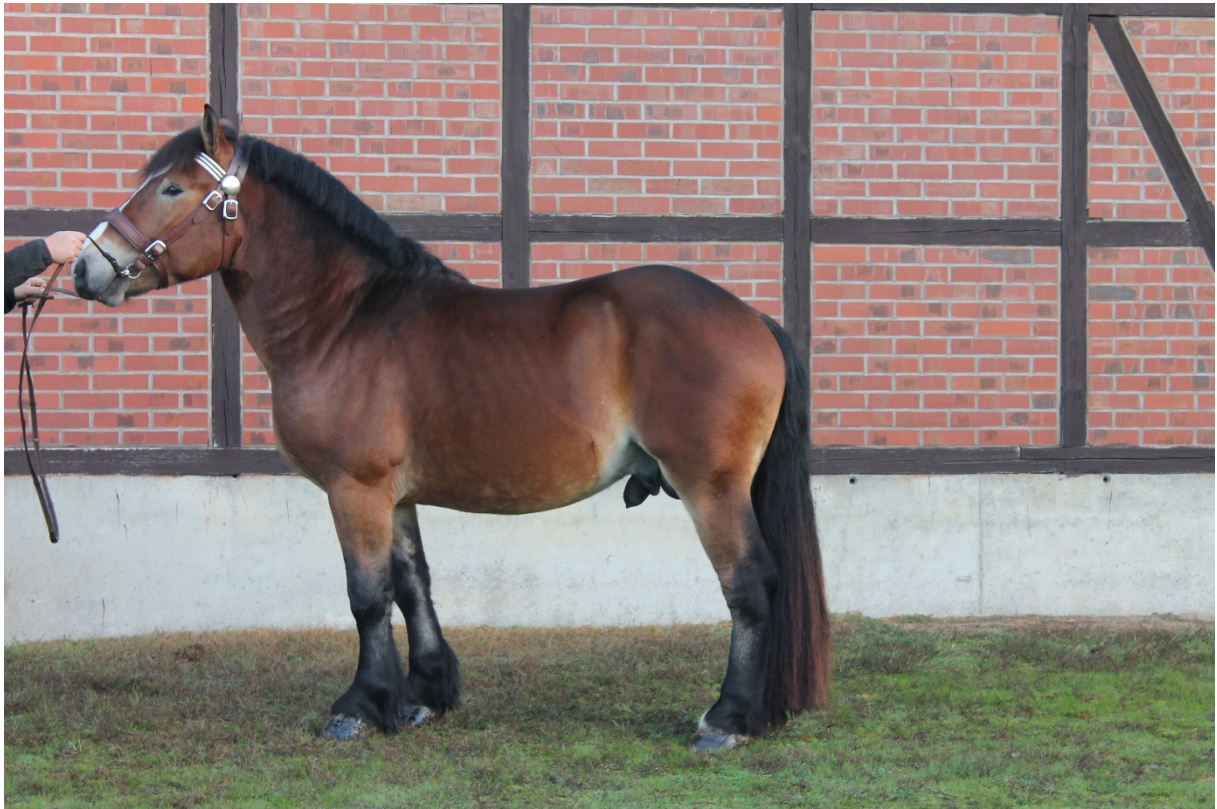

Young stallion at licensing



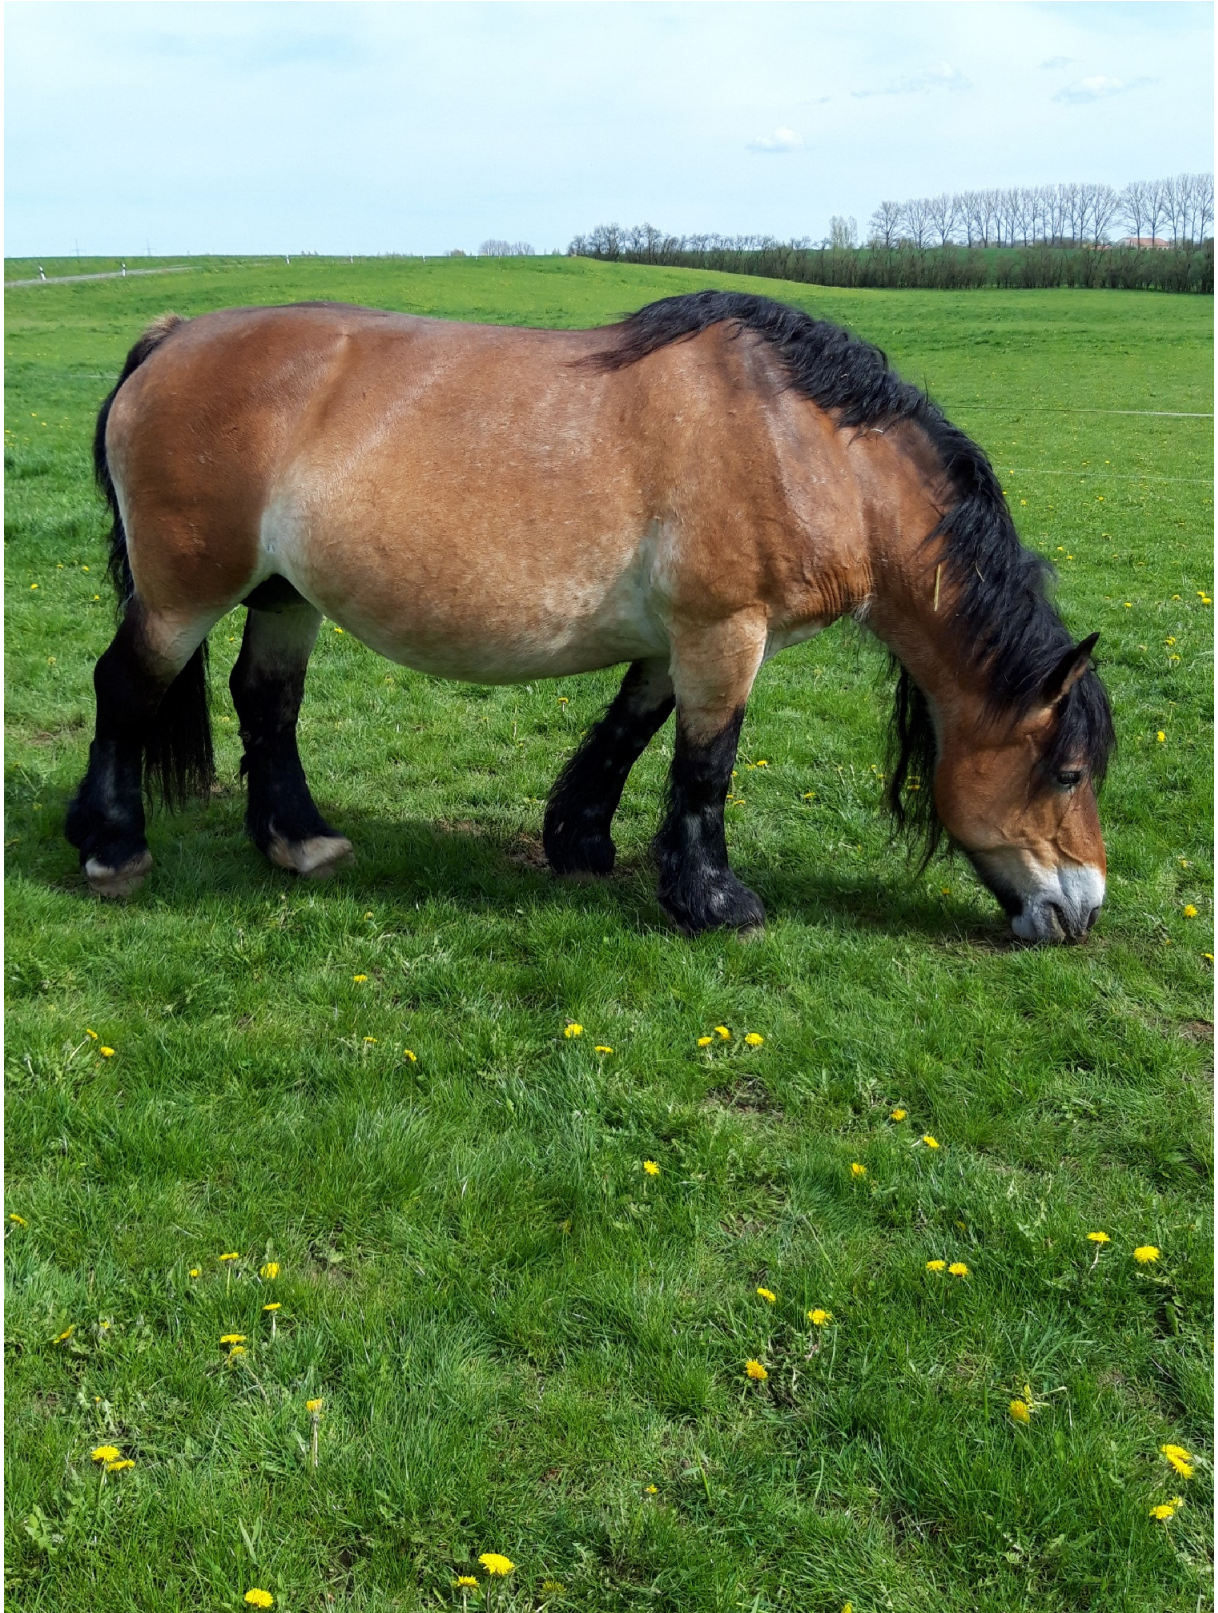

Broadmare at pasture



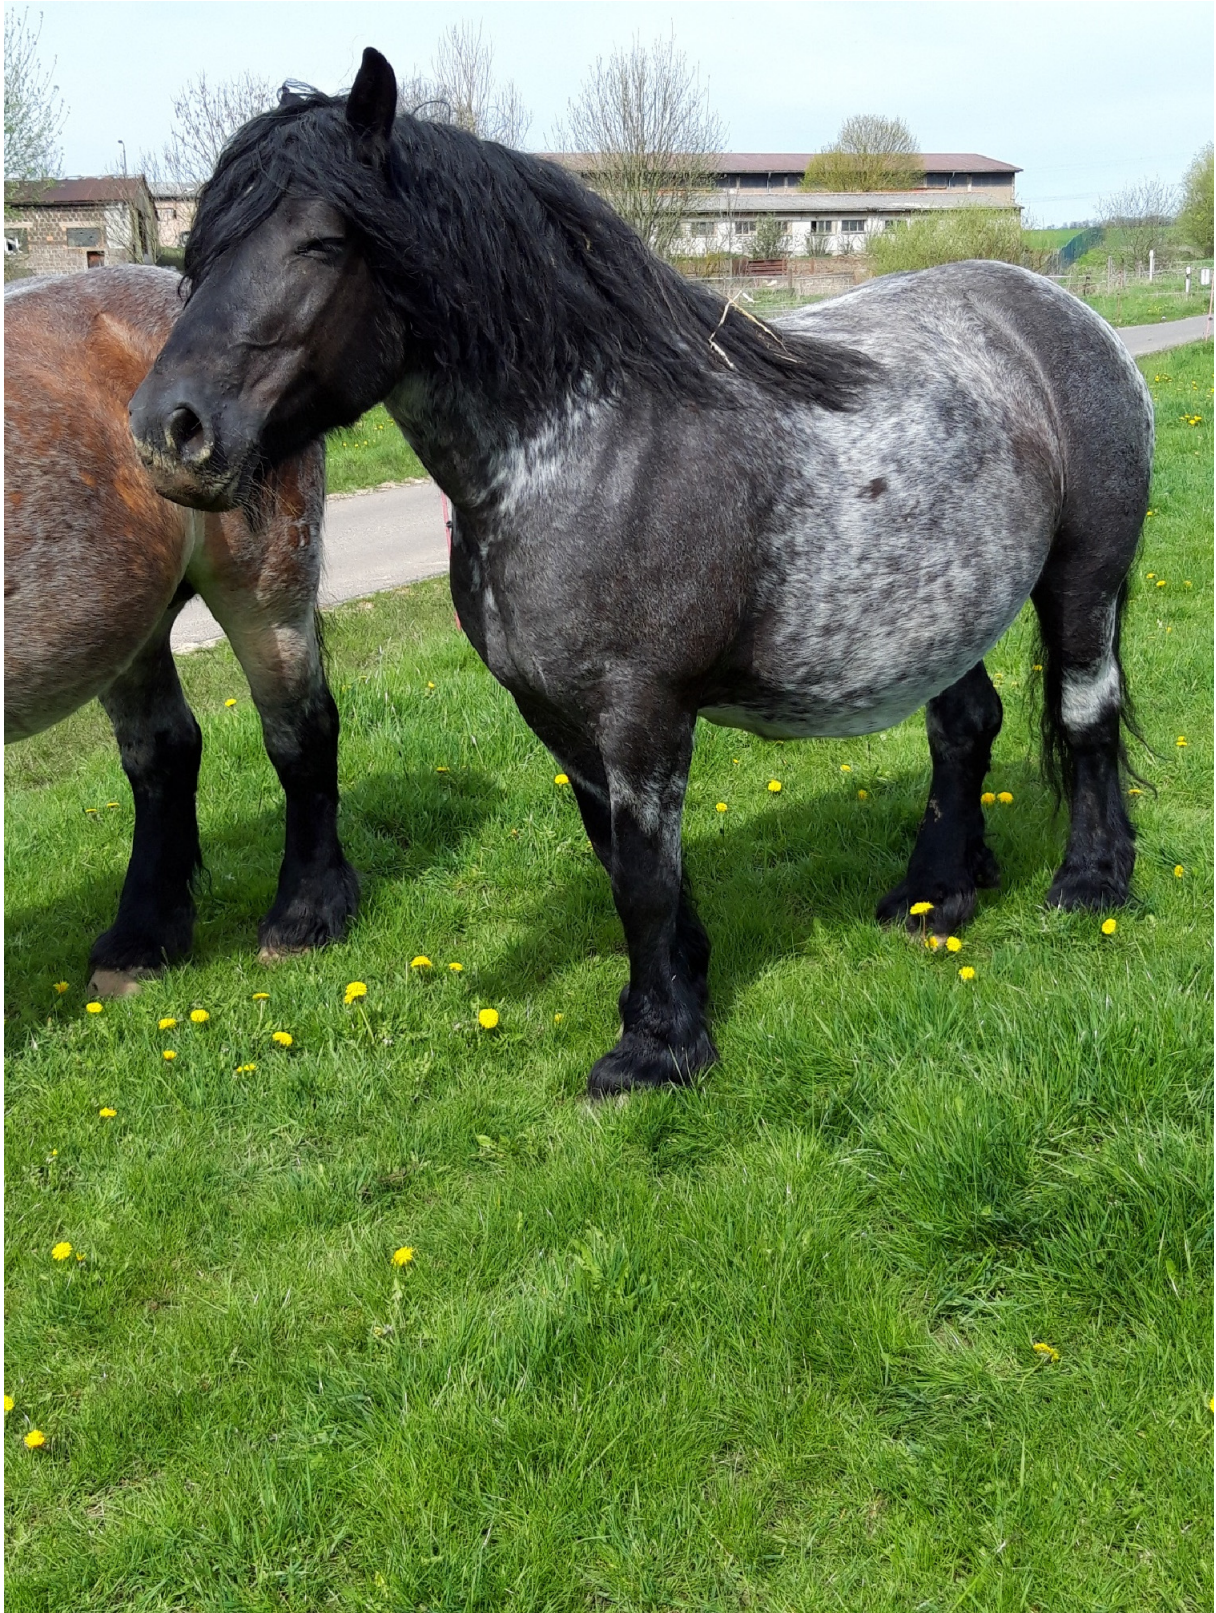

Broadmare at pasture



**Table S1.** Distribution of horses by age in years and scores of chronic progressive lymphedema (CPL on a scale from 1-6) in Rhenish German draught horses. Horses with a CPL-score of 1 are classified as unaffected and horses with a CPL-score of 2 and 6 with the mildest and most severe signs of CPL, respectively. The dichotomous CPL-score (CPL-bin-score, Cbin expressed as frequencies) differentiates between horses with a CPL-score of 1 (unaffected and 2-6 (affected) and CPL-bin-sum is the sum of the CPL-bin-score over all four limbs (Csum, Csum of 1 = no limb affected and Csum of 5 = all four limbs affected)

| Age (years) | No of horses<br>per year and<br>cumulative |     | CPL-score |     |      |      |      |     |               | Cbin        | Csum        |
|-------------|--------------------------------------------|-----|-----------|-----|------|------|------|-----|---------------|-------------|-------------|
|             |                                            |     | 1         | 2   | 3    | 4    | 5    | 6   | Mean±SD       |             |             |
| 1           | 67                                         | 67  | 67        | 0   | 0    | 0    | 0    | 0   | 1.000 ± 0.000 | 0.00        | 1.00        |
| 2           | 41                                         | 108 | 32        | 5   | 3    | 1    | 0    | 0   | 1.341 ± 0.728 | 0.22        | 1.61        |
| 3           | 31                                         | 139 | 15        | 4   | 10   | 2    | 0    | 0   | 1.967 ± 1.048 | 0.52        | 2.74        |
| 4           | 41                                         | 180 | 19        | 5   | 13   | 4    | 0    | 0   | 2.049 ± 1.094 | 0.54        | 2.66        |
| 5           | 29                                         | 209 | 8         | 0   | 12   | 9    | 0    | 0   | 2.805 ± 1.222 | 0.72        | 3.59        |
| 6           | 28                                         | 237 | 8         | 1   | 10   | 9    | 0    | 0   | 2.714 ± 1.213 | 0.71        | 3.43        |
| 7           | 29                                         | 266 | 6         | 3   | 12   | 4    | 4    | 0   | 2.897 ± 1.291 | 0.79        | 3.76        |
| 8           | 18                                         | 284 | 2         | 2   | 5    | 5    | 4    | 0   | 3.389 ± 1.290 | 0.88        | 4.17        |
| 9           | 23                                         | 307 | 2         | 2   | 4    | 12   | 3    | 0   | 3.521 ± 1.123 | 0.91        | 4.26        |
| 10          | 26                                         | 333 | 2         | 3   | 5    | 10   | 5    | 1   | 3.615 ± 1.267 | 0.92        | 4.35        |
| 11          | 15                                         | 348 | 2         | 0   | 4    | 5    | 4    | 0   | 3.600 ± 1.298 | 0.87        | 4.27        |
| 12          | 21                                         | 369 | 0         | 3   | 4    | 10   | 3    | 1   | 3.762 ± 1.044 | 1.00        | 4.71        |
| 13          | 15                                         | 384 | 3         | 0   | 2    | 4    | 4    | 2   | 3.800 ± 1.699 | 0.80        | 4.27        |
| 14          | 15                                         | 399 | 1         | 0   | 3    | 6    | 5    | 0   | 3.933 ± 1.100 | 0.93        | 4.60        |
| 15          | 19                                         | 418 | 1         | 0   | 2    | 7    | 8    | 1   | 4.263 ± 1.098 | 0.95        | 4.63        |
| 16          | 12                                         | 430 | 1         | 0   | 5    | 3    | 3    | 0   | 3.583 ± 1.165 | 0.92        | 4.33        |
| 17          | 6                                          | 436 | 0         | 2   | 1    | 1    | 2    | 0   | 3.500 ± 1.378 | 1.00        | 4.00        |
| 18          | 15                                         | 451 | 0         | 0   | 1    | 7    | 7    | 0   | 4.400 ± 0.632 | 1.00        | 4.93        |
| 19          | 11                                         | 462 | 0         | 0   | 1    | 7    | 2    | 1   | 4.273 ± 0.786 | 1.00        | 4.91        |
| 20          | 9                                          | 471 | 0         | 0   | 1    | 6    | 2    | 0   | 4.111 ± 0.601 | 1.00        | 4.89        |
| 21          | 4                                          | 475 | 0         | 0   | 0    | 0    | 4    | 0   | 5.000 ± 0.000 | 1.00        | 5.00        |
| 22          | 7                                          | 482 | 1         | 0   | 1    | 5    | 0    | 0   | 3.428 ± 1.134 | 0.86        | 4.29        |
| 23          | 3                                          | 485 | 0         | 0   | 0    | 0    | 3    | 0   | 5.000 ± 0.000 | 1.00        | 5.00        |
| 24          | 2                                          | 487 | 0         | 1   | 0    | 1    | 0    | 0   | -             | 1.00        | 3.50        |
| 25          | 2                                          | 489 | 0         | 0   | 1    | 0    | 1    | 0   | -             | 1.00        | 4.50        |
| 26          | 1                                          | 490 | 0         | 0   | 0    | 1    | 0    | 0   | -             | 1.00        | 4.00        |
| 27          | 1                                          | 491 | 0         | 0   | 0    | 1    | 0    | 0   | -             | 1.00        | 5.00        |
| 28          | 1                                          | 492 | 0         | 0   | 0    | 0    | 1    | 0   | -             | 1.00        | 5.00        |
| 34          | 1                                          | 493 | 0         | 0   | 1    | 0    | 0    | 0   | -             | 1.00        | 5.00        |
| Total (n)   | 493                                        | 493 | 170       | 31  | 101  | 120  | 65   | 6   | 2.791 ± 1.511 | 0.66 ± 0.48 | 3.35 ± 1.81 |
| Percentage  | (                                          | 100 | 34.5      | 6.3 | 20.5 | 24.3 | 13.2 | 1.2 |               |             |             |

**Table S2.** Means and standard deviations for body and hoof traits by males (n=80), geldings (n=55) and females (n=261) in Rhenish German draught horses aged >1 year.

| Variate                                    | Male           | Gelding       | Female         |
|--------------------------------------------|----------------|---------------|----------------|
| Height at withers (cm)                     | 162.21 ± 6.20  | 164.35 ± 6.05 | 160.54 ± 5.52  |
| Body length (cm)                           | 171.74 ± 8.51  | 176.42 ± 9.21 | 177.75 ± 8.63  |
| Chest circumference (cm)                   | 202.54 ± 10.53 | 214.06 ± 9.98 | 213.61 ± 13.22 |
| Skinfold thickness at the neck region (mm) | 7.16 ± 1.66    | 6.47 ± 0.95   | 5.50 ± 1.12    |
| <b>Front left limb</b>                     |                |               |                |
| Cannon bone circumference (cm)             | 27.41 ± 3.57   | 27.07 ± 1.88  | 25.50 ± 2.86   |
| Circumference coronary band (cm)           | 49.92 ± 2.91   | 50.50 ± 4.98  | 48.38 ± 4.62   |
| Shore D hardness of hoof horn              | 59.33 ± 11.07  | 64.10 ± 10.26 | 62.82 ± 9.95   |
| Length of the dorsal wall (cm)             | 10.80 ± 1.29   | 10.65 ± 1.17  | 10.38 ± 1.05   |
| Length of the heel wall (cm)               | 7.37 ± 1.92    | 7.46 ± 1.81   | 7.02 ± 1.80    |
| Front hoof angle (°)                       | 52.74 ± 4.58   | 52.76 ± 6.00  | 51.39 ± 5.67   |
| <b>Hind right limb</b>                     |                |               |                |
| Circumference of cannon bone (cm)          | 30.96 ± 3.45   | 30.53 ± 2.16  | 28.66 ± 2.27   |
| Circumference coronary band (cm)           | 49.25 ± 3.96   | 49.55 ± 4.93  | 48.16 ± 3.76   |
| Shore D hardness of hoof horn              | 57.75 ± 12.62  | 65.74 ± 11.68 | 63.92 ± 10.66  |
| Length of the dorsal wall (cm)             | 10.18 ± 1.05   | 10.48 ± 1.25  | 10.09 ± 1.02   |
| Length of the heel wall (cm)               | 6.83 ± 1.61    | 7.16 ± 1.51   | 6.93 ± 5.00    |
| Front hoof angle (°)                       | 55.09 ± 5.38   | 53.81 ± 4.52  | 52.12 ± 5.92   |

#### Definitions:

Height at withers: distance between the highest point of the withers and the ground surface

Body length: distance between *tuberculum majus ossis humeri* and *tuber ischiadicum* (maximal oblique trunk length)

Chest circumference: circumference of the *thorax* behind the shoulders

Cannon bone circumference: metacarpal circumference or metatarsal circumference at the smallest diameter

Circumference coronary band: Circumference at the top of the hoof wall

Length of the dorsal wall: Length of dorsal border from horn junction at coronary band to apex of toe

Length of the heel wall: length of the heel wall at the angle of the bar

Front hoof angle: Angle of dorsal border to weight-bearing surface of the hoof wall

**Table S3.** Levels of fixed effects for farm-related variables with number of horses and means of the CPL-score, CPL-bin-score and CPL-bin-sum for each level.

| Effect | Level and no of level     |   | No of horses | CPL-score | CPL-bin-score | CPL-bin-sum |
|--------|---------------------------|---|--------------|-----------|---------------|-------------|
| OUTS   |                           |   |              |           |               |             |
|        | Paddock with open barn    | 1 | 34           | 4.09      | 0.97          | 4.70        |
|        | Pasture                   | 2 | 357          | 2.85      | 0.68          | 3.44        |
|        | Pasture and paddock       | 3 | 92           | 2.01      | 0.43          | 2.40        |
|        | Unknown                   | 4 | 10           | 3.30      | 0.90          | 4.40        |
| BED    |                           |   |              |           |               |             |
|        | Barley straw              | 1 | 57           | 3.67      | 0.86          | 4.14        |
|        | Rye straw                 | 2 | 16           | 3.12      | 0.75          | 3.31        |
|        | Wheat straw               | 3 | 127          | 2.82      | 0.69          | 3.46        |
|        | Wood shavings             | 4 | 12           | 4.00      | 1.00          | 5.00        |
|        | Barley + wheat straw      | 5 | 167          | 2.50      | 0.56          | 2.96        |
|        | Rye + wheat straw         | 6 | 55           | 1.84      | 0.42          | 2.36        |
|        | Any straw                 | 7 | 28           | 3.57      | 0.86          | 4.32        |
|        | Unknown                   | 8 | 31           | 2.97      | 0.74          | 3.87        |
| CLEAN  |                           |   |              |           |               |             |
|        | 1-7 days                  | 1 | 254          | 2.79      | 0.65          | 3.35        |
|        | 2-4 weeks                 | 2 | 145          | 2.59      | 0.61          | 3.12        |
|        | 1-2 months                | 3 | 63           | 3.14      | 0.73          | 3.67        |
|        | >2 months                 | 4 | 31           | 3.03      | 0.74          | 3.84        |
| ROUW   |                           |   |              |           |               |             |
|        | Hay                       | 1 | 198          | 2.75      | 0.66          | 3.35        |
|        | Hay + straw               | 2 | 89           | 3.11      | 0.72          | 3.61        |
|        | Hay + silage or haysilage | 3 | 153          | 2.46      | 0.54          | 2.92        |
|        | Haysilage                 | 4 | 39           | 3.41      | 0.85          | 4.21        |
|        | Unknown                   | 5 | 14           | 3.21      | 0.86          | 4.29        |
| CONW   |                           |   |              |           |               |             |
|        | Concentrates              | 1 | 377          | 2.90      | 0.68          | 3.46        |
|        | No concentrates           | 2 | 116          | 2.44      | 0.58          | 3.03        |
| HOFT   |                           |   |              |           |               |             |
|        | 4–8 weeks                 | 1 | 147          | 3.56      | 0.86          | 4.24        |
|        | 9–12 weeks                | 2 | 105          | 3.08      | 0.75          | 3.65        |
|        | 13–16 weeks               | 3 | 85           | 2.58      | 0.65          | 3.22        |
|        | >16 weeks                 | 4 | 26           | 2.23      | 0.58          | 2.81        |
|        | Unknown                   | 5 | 130          | 1.94      | 0.37          | 2.32        |

Abbreviations: OUTS = Outdoor facilities for horses in summer, BED = Bedding type, CLEAN = Time interval for cleaning out the stable, ROUW = Type of roughage fed in winter months, CONW = Type of concentrate fed in winter months, HOFT = Length of hoof trimming intervals.

**Table S4.** Additive genetic (above the diagonal), residual (below the diagonal) and phenotypic ( $r_p$ ) correlations (below the diagonal) including their standard errors between CPL-scores of the different limbs in Rhenish German draught horses using a linear multivariate animal model.

| CPL-Scores        | Front left        |       | Front right       |       | Hind left         |       | Hind right        | Overall CPL-score |       |
|-------------------|-------------------|-------|-------------------|-------|-------------------|-------|-------------------|-------------------|-------|
|                   |                   | $r_p$ |                   | $r_p$ |                   | $r_p$ |                   |                   | $r_p$ |
| Front left        | -                 |       | 0.992 $\pm$ 0.147 |       | 0.942 $\pm$ 0.199 |       | 0.919 $\pm$ 0.114 | 0.966 $\pm$ 0.034 | 0.791 |
| Front right       | 0.752 $\pm$ 0.046 | 0.816 | -                 |       | 0.956 $\pm$ 0.140 |       | 0.911 $\pm$ 0.105 | 0.910 $\pm$ 0.051 | 0.832 |
| Hind left         | 0.547 $\pm$ 0.111 | 0.666 | 0.560 $\pm$ 0.166 | 0.736 | -                 |       | 0.979 $\pm$ 0.043 | 0.959 $\pm$ 0.027 | 0.842 |
| Hind right        | 0.529 $\pm$ 0.151 | 0.647 | 0.640 $\pm$ 0.105 | 0.832 | 0.731 $\pm$ 0.185 | 0.842 | -                 | 0.935 $\pm$ 0.031 | 0.863 |
| Overall CPL-score | 0.729 $\pm$ 0.051 |       | 0.796 $\pm$ 0.048 |       | 0.742 $\pm$ 0.033 |       | 0.802 $\pm$ 0.031 | -                 | -     |

**Table S5.** Additive genetic (above the diagonal), residual (below the diagonal) and phenotypic ( $r_p$ ) correlations (below the diagonal) including their standard errors between the sum of CPL-scores of the front and hind limbs and the maximum values of CPL-scores of the front and hind limbs and the overall CPL-score in Rhenish German draught horses using a linear multivariate animal model.

| CPL-Scores        | Front sum         |       | Hind sum          |       | Front max         |       | Hind max          | Overall CPL-score |       |
|-------------------|-------------------|-------|-------------------|-------|-------------------|-------|-------------------|-------------------|-------|
|                   |                   | $r_p$ |                   | $r_p$ |                   | $r_p$ |                   |                   | $r_p$ |
| Front sum         | -                 |       | 0.902 $\pm$ 0.059 |       | 0.986 $\pm$ 0.015 |       | 0.902 $\pm$ 0.059 | 0.954 $\pm$ 0.045 | 0.855 |
| Hind sum          | 0.898 $\pm$ 0.065 | 0.752 | -                 |       | 0.942 $\pm$ 0.047 |       | 0.995 $\pm$ 0.005 | 0.939 $\pm$ 0.031 | 0.886 |
| Front max         | 0.949 $\pm$ 0.010 | 0.959 | 0.627 $\pm$ 0.062 | 0.732 | -                 |       | 0.948 $\pm$ 0.049 | 0.932 $\pm$ 0.062 | 0.861 |
| Hind max          | 0.627 $\pm$ 0.066 | 0.735 | 0.939 $\pm$ 0.013 | 0.967 | 0.586 $\pm$ 0.068 | 0.723 | -                 | 0.986 $\pm$ 0.019 | 0.901 |
| Overall CPL-score | 0.803 $\pm$ 0.042 | 0.856 | 0.837 $\pm$ 0.038 | 0.887 | 0.807 $\pm$ 0.067 | 0.861 | 0.796 $\pm$ 0.019 | -                 | -     |



**Table S8.** Additive genetic, residual and phenotypic correlations (including their SE) with the sum of dichotomous CPL-scores over all four limbs (CPL-bin-sum) of chronic progressive lymphedema in Rhenish German draught horses using a linear multivariate animal model.

| Body trait                    | Genetic |       | Residual |       | Phenotypic |
|-------------------------------|---------|-------|----------|-------|------------|
|                               | $r_g$   | SE    | $r_e$    | SE    | $r_p$      |
| Height at withers             | 0.492   | 0.120 | 0.184    | 0.104 | 0.239      |
| Body length                   | 0.367   | 0.170 | 0.039    | 0.076 | 0.104      |
| Chest circumference           | 0.105   | 0.161 | 0.103    | 0.074 | 0.101      |
| Skinfold thickness            | 0.450   | 0.123 | 0.032    | 0.086 | 0.117      |
| <b>Front left limb</b>        |         |       |          |       |            |
| Cannon bone circumference     | 0.695   | 0.191 | 0.135    | 0.076 | 0.250      |
| Circumference coronary band   | 0.070   | 0.136 | 0.196    | 0.235 | 0.082      |
| Shore D hardness of hoof horn | -0.358  | 0.115 | 0.031    | 0.087 | -0.055     |
| Length of the dorsal wall     | -0.002  | 0.169 | 0.100    | 0.108 | 0.052      |
| Length of the heel wall       | 0.300   | 0.194 | 0.040    | 0.088 | 0.093      |
| Front hoof angle              | -0.093  | 0.163 | 0.027    | 0.076 | 0.039      |
| <b>Hind right limb</b>        |         |       |          |       |            |
| Cannon bone circumference     | 0.738   | 0.108 | 0.160    | 0.091 | 0.297      |
| Circumference coronary band   | 0.031   | 0.175 | 0.251    | 0.103 | 0.176      |
| Shore D hardness of hoof horn | -0.373  | 0.208 | 0.024    | 0.083 | -0.039     |
| Length of the dorsal wall     | -0.067  | 0.159 | 0.194    | 0.111 | 0.101      |
| Length of the heel wall       | 0.277   | 0.343 | 0.034    | 0.075 | 0.056      |
| Front hoof angle              | -0.050  | 0.129 | 0.117    | 0.112 | 0.053      |

**Table S9.** Heritabilities with their standard errors (SE) for body traits and their additive genetic and residual correlations (including their SE) with the overall score across all four limbs of chronic progressive lymphedema (CPL-score) in Rhenish German draught horses using a threshold-linear multivariate animal model with genomic relationship matrices.

| Body trait                    | Heritability |       | Genetic |       | Residual |       |
|-------------------------------|--------------|-------|---------|-------|----------|-------|
|                               | $h^2$        | SE    | $r_g$   | SE    | $r_e$    | SE    |
| Height at withers             | 0.557        | 0.118 | 0.555   | 0.201 | -0.005   | 0.238 |
| Body length                   | 0.175        | 0.122 | 0.195   | 0.392 | -0.126   | 0.160 |
| Chest circumference           | 0.230        | 0.112 | 0.693   | 0.266 | -0.223   | 0.184 |
| Skinfold thickness            | 0.343        | 0.120 | 0.517   | 0.202 | 0.011    | 0.162 |
| <b>Front left limb</b>        |              |       |         |       |          |       |
| Cannon bone circumference     | 0.351        | 0.085 | 0.825   | 0.116 | 0.147    | 0.126 |
| Circumference coronary band   | 0.779        | 0.143 | 0.488   | 0.178 | -0.549   | 0.315 |
| Shore D hardness of hoof horn | 0.358        | 0.151 | -0.517  | 0.316 | 0.030    | 0.213 |
| Length of the dorsal wall     | 0.586        | 0.130 | -0.007  | 0.188 | 0.227    | 0.229 |
| Length of the heel wall       | 0.334        | 0.115 | 0.552   | 0.252 | 0.083    | 0.158 |
| Front hoof angle              | 0.153        | 0.110 | 0.283   | 0.488 | 0.177    | 0.178 |
| <b>Hind right limb</b>        |              |       |         |       |          |       |
| Cannon bone circumference     | 0.548        | 0.099 | 0.671   | 0.141 | 0.484    | 0.149 |
| Circumference coronary band   | 0.369        | 0.127 | 0.143   | 0.238 | 0.172    | 0.181 |
| Shore D hardness of hoof horn | 0.234        | 0.147 | -0.304  | 0.321 | -0.167   | 0.165 |
| Length of the dorsal wall     | 0.602        | 0.117 | 0.006   | 0.203 | 0.182    | 0.222 |
| Length of the heel wall       | 0.092        | 0.084 | 0.257   | 0.561 | 0.040    | 0.201 |
| Front hoof angle              | 0.549        | 0.161 | -0.269  | 0.290 | 0.422    | 0.229 |

**Table S10.** Additive genetic and residual correlations (including their SE) with the sum of dichotomous CPL-scores over all four limbs (CPL-bin-sum) of chronic progressive lymphedema in Rhenish German draught horses using linear-threshold bivariate animal models and genomic relationship matrices.

| Body trait                    | Genetic |       | Residual |       |
|-------------------------------|---------|-------|----------|-------|
|                               | $r_g$   | SE    | $r_e$    | SE    |
| Height at withers             | 0.661   | 0.218 | 0.128    | 0.209 |
| Body length                   | 0.301   | 0.517 | -0.039   | 0.162 |
| Chest circumference           | 0.693   | 0.290 | -0.106   | 0.199 |
| Skinfold thickness            | 0.609   | 0.226 | 0.116    | 0.195 |
| <b>Front left limb</b>        |         |       |          |       |
| Cannon bone circumference     | 0.729   | 0.173 | 0.680    | 0.132 |
| Circumference coronary band   | 0.198   | 0.114 | 0.135    | 0.105 |
| Shore D hardness of hoof horn | -0.310  | 0.137 | -0.036   | 0.081 |
| Length of the dorsal wall     | 0.047   | 0.134 | 0.222    | 0.075 |
| Length of the heel wall       | 0.563   | 0.264 | -0.052   | 0.083 |
| Front hoof angle              | 0.457   | 0.152 | -0.208   | 0.086 |
| <b>Hind right limb</b>        |         |       |          |       |
| Cannon bone circumference     | 0.687   | 0.200 | 0.538    | 0.168 |
| Circumference coronary band   | -0.287  | 0.326 | 0.598    | 0.237 |
| Shore D hardness of hoof horn | -0.305  | 0.151 | -0.073   | 0.199 |
| Length of the dorsal wall     | -0.306  | 0.311 | 0.494    | 0.253 |
| Length of the heel wall       | 0.481   | 0.587 | 0.220    | 0.257 |
| Front hoof angle              | -0.230  | 0.392 | 0.270    | 0.278 |

**Table S11.** Additive genetic and residual correlations (including their SE) with the dichotomous CPL-score across all four limbs (CPL-bin-score) of chronic progressive lymphedema in Rhenish German draught horses using a linear-threshold bivariate animal models and genomic relationship matrices.

| Body trait                    | Genetic |       | Residual |       |
|-------------------------------|---------|-------|----------|-------|
|                               | $r_g$   | SE    | $r_e$    | SE    |
| Height at withers             | 0.793   | 0.240 | 0.208    | 0.160 |
| Body length                   | 0.054   | 0.634 | 0.189    | 0.133 |
| Chest circumference           | 0.556   | 0.435 | 0.171    | 0.133 |
| Skinfold thickness            | 0.784   | 0.285 | 0.177    | 0.146 |
| <b>Front left limb</b>        |         |       |          |       |
| Cannon bone circumference     | 0.868   | 0.202 | 0.264    | 0.141 |
| Circumference coronary band   | 0.456   | 0.520 | 0.019    | 0.290 |
| Shore D hardness of hoof horn | -0.446  | 0.518 | 0.020    | 0.165 |
| Length of the dorsal wall     | 0.137   | 0.541 | 0.044    | 0.178 |
| Length of the heel wall       | 0.449   | 0.536 | 0.090    | 0.168 |
| Front hoof angle              | 0.062   | 0.688 | 0.096    | 0.166 |
| <b>Hind right limb</b>        |         |       |          |       |
| Cannon bone circumference     | 0.867   | 0.154 | 0.316    | 0.145 |
| Circumference coronary band   | -0.404  | 0.536 | 0.366    | 0.178 |
| Shore D hardness of hoof horn | -0.235  | 0.665 | -0.055   | 0.170 |
| Length of the dorsal wall     | -0.487  | 0.427 | 0.331    | 0.213 |
| Length of the heel wall       | -0.151  | 0.679 | 0.080    | 0.128 |
| Front hoof angle              | -0.196  | 0.633 | 0.170    | 0.214 |
